# Supplementary material for: PDCD6 regulates lactate metabolism to modulate LC3-associated phagocytosis and antibacterial defense
Source: PubMed Central journal article supplement — Nat Commun. 2024 Nov 23;15:10157. doi: 10.1038/s41467-024-54377-w (PMC11584876; doi:10.1038/s41467-024-54377-w), 2024-11-23
Supplement: 41467_2024_54377_MOESM1_ESM.pdf [file 41467_2024_54377_MOESM1_ESM.pdf]

## **PDCD6 regulates lactate metabolism to modulate LC3-associated phagocytosis and antibacterial defense**

Lulu Sun<sup>1, †</sup>, Sijin Wu<sup>2, †</sup>, Hui Wang<sup>1</sup>, Tianyu Zhang<sup>1</sup>, Mengyu Zhang<sup>1</sup>, Xuepeng Bai<sup>3</sup>, Xiumei Zhang<sup>4</sup>, Bingqing Li<sup>5</sup>, Cai Zhang<sup>6</sup>, Yan Li<sup>1</sup>, Jun Zhou<sup>1,7\*</sup> and Tianliang Li<sup>1\*</sup>

<sup>1</sup> Center for Cell Structure and Function, Shandong Provincial Key Laboratory of Animal Resistance Biology, Collaborative Innovation Center of Cell Biology in Universities of Shandong, College of Life Sciences, Shandong Normal University, Jinan 250358, China.

<sup>2</sup> Academy of Pharmacy, Xi'an Jiaotong-Liverpool University, Suzhou, 215123, China.

<sup>3</sup> Department of Cardiac Surgery, Public Health Clinical Center Affiliated to Shandong University, Jinan, 250013, China.

<sup>4</sup> School of Health Care Security, Shandong First Medical University & Shandong Academy of Medical Sciences, Jinan, 250117, China.

<sup>5</sup> Department of Pathogen Biology, School of Clinical and Basic Medical Sciences, Shandong First Medical University & Shandong Academy of Medical Sciences, Jinan, 250117, China.

<sup>6</sup> Institute of Immunopharmacology and Immunotherapy, School of Pharmaceutical Sciences, Shandong University, Jinan 250012, China.

<sup>7</sup> State Key Laboratory of Medicinal Chemical Biology, Haihe Laboratory of Cell Ecosystem, College of Life Sciences, Nankai University, Tianjin, 300071, China.

† These authors contributed equally: Lulu Sun, Sijin Wu.

\*Correspondence: [li.tianliang@outlook.com](mailto:li.tianliang@outlook.com) and [junzhou@sdu.edu.cn](mailto:junzhou@sdu.edu.cn)

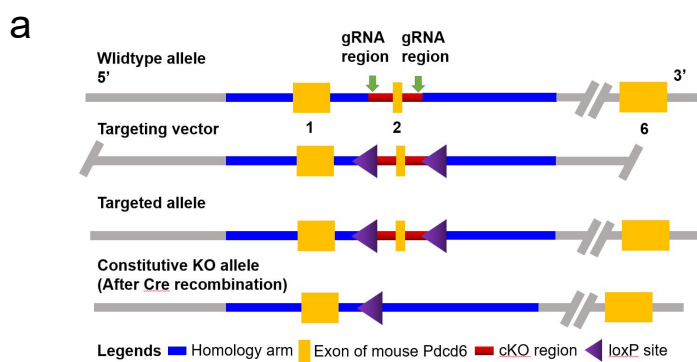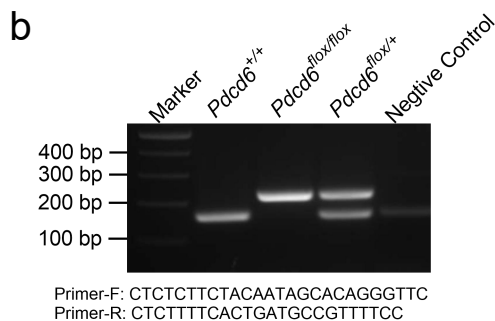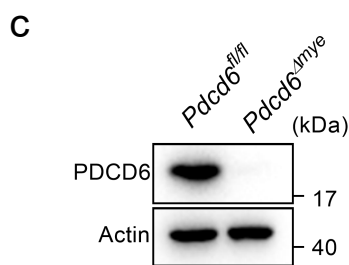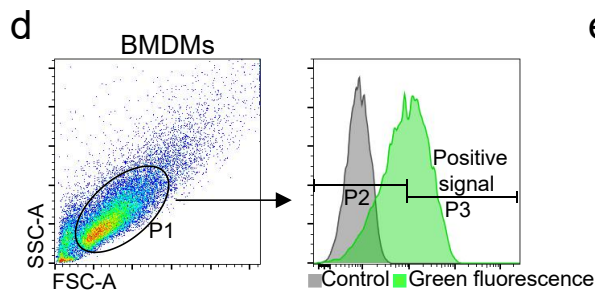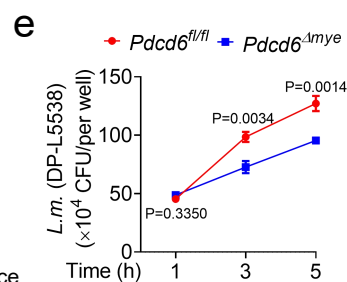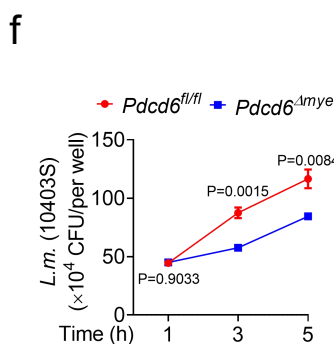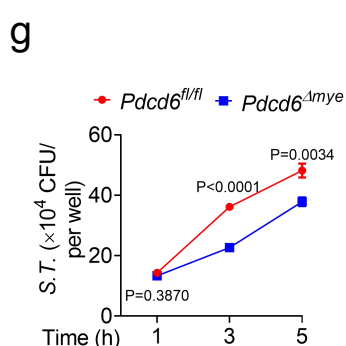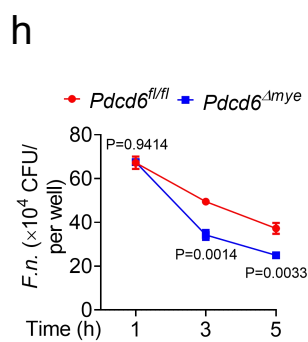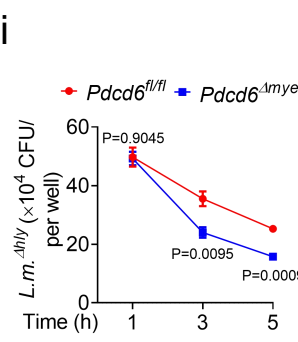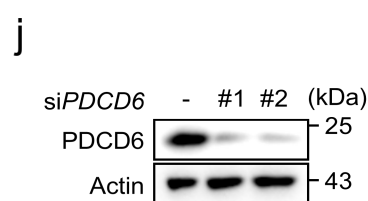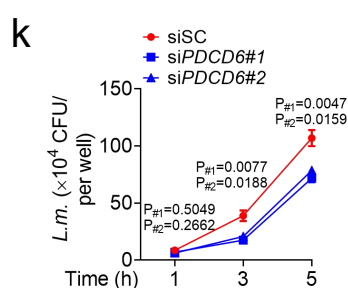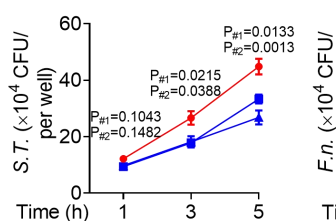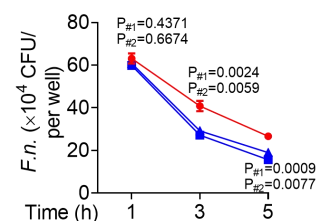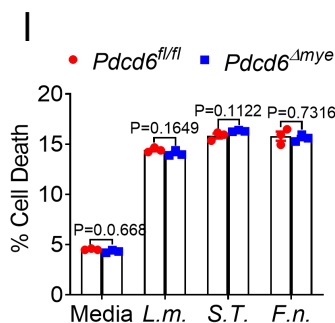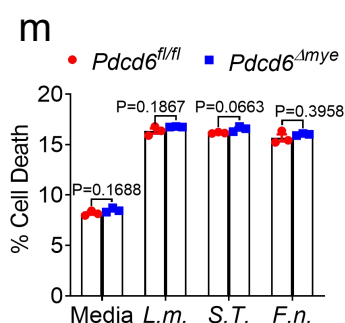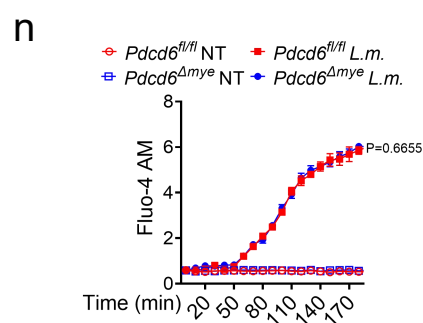

**Supplementary Fig. 1 Deficiency of PDCD6 increases bacterial killing in cells.**

**a** Graphic of the strategy to generate myeloid-specific *Pdcd6* deletion mice. **b** Genotyping result for indicated mice and the primers used for genotyping. **c** Immunoblotting of PDCD6 in *Pdcd6<sup>fl/fl</sup>* and *Pdcd6<sup>Amye</sup>* mice. **d**, Gating strategy to detect green fluorescence signal in BMDMs. Live cells were gated based on forward scatter area (FSC-A) and side scatter area (SSC-A), establishing the P1 gate. A subset of P1 gates was identified using FITC-A, with subset P2 serving as the blank control gate and subset P3 representing the positive signal gate. **e-i** Gentamicin protection assays on *Pdcd6<sup>fl/fl</sup>* and *Pdcd6<sup>Amye</sup>* peritoneal macrophages infected with *L. monocytogenes* (DP-L5538) (MOI, 5) (**e**), *L. monocytogenes* (10403S) (MOI, 5) (**f**), *S. Typhimurium* (MOI, 5) (**g**), *F. novicida* (MOI, 20) (**h**) and *L. monocytogenes*  $\Delta$ *hly* (10403S) (**i**), respectively. **j** Protein expression of PDCD6 in siPDCD6 #1 and siPDCD6 #2 THP-1 cells. **k** Gentamicin protection assays on siCtrl and siPDCD6 THP-1 cells infected with *L. monocytogenes* (DP-L5538) (MOI, 5), *S. Typhimurium* (MOI, 5), and *F. novicida* (MOI, 20), respectively. **l-m** Percentage of cell death in *Pdcd6<sup>fl/fl</sup>* and *Pdcd6<sup>Amye</sup>* BMDMs (**l**) or peritoneal macrophages (**m**) infected with indicated bacteria. **n** *Pdcd6<sup>fl/fl</sup>* and *Pdcd6<sup>Amye</sup>* BMDMs were incubated with Fluo-4, followed by *L. monocytogenes* (MOI, 5) challenge. The fluorescence signal was read using a microplate reader. The averages of  $n = 6$  (**e-i**, **k**),  $n = 3$  (**l**, **m**),  $n = 4$  (**n**) biologically independent samples are shown. Data are shown as the mean  $\pm$  SEM. Statistical significance was determined using *t*-test (and nonparametric tests) (**e-i**, **l-n**) and Two-way ANOVA (multiple comparisons) (**k**). The presented data are representative of three independent experiments (**b-n**).

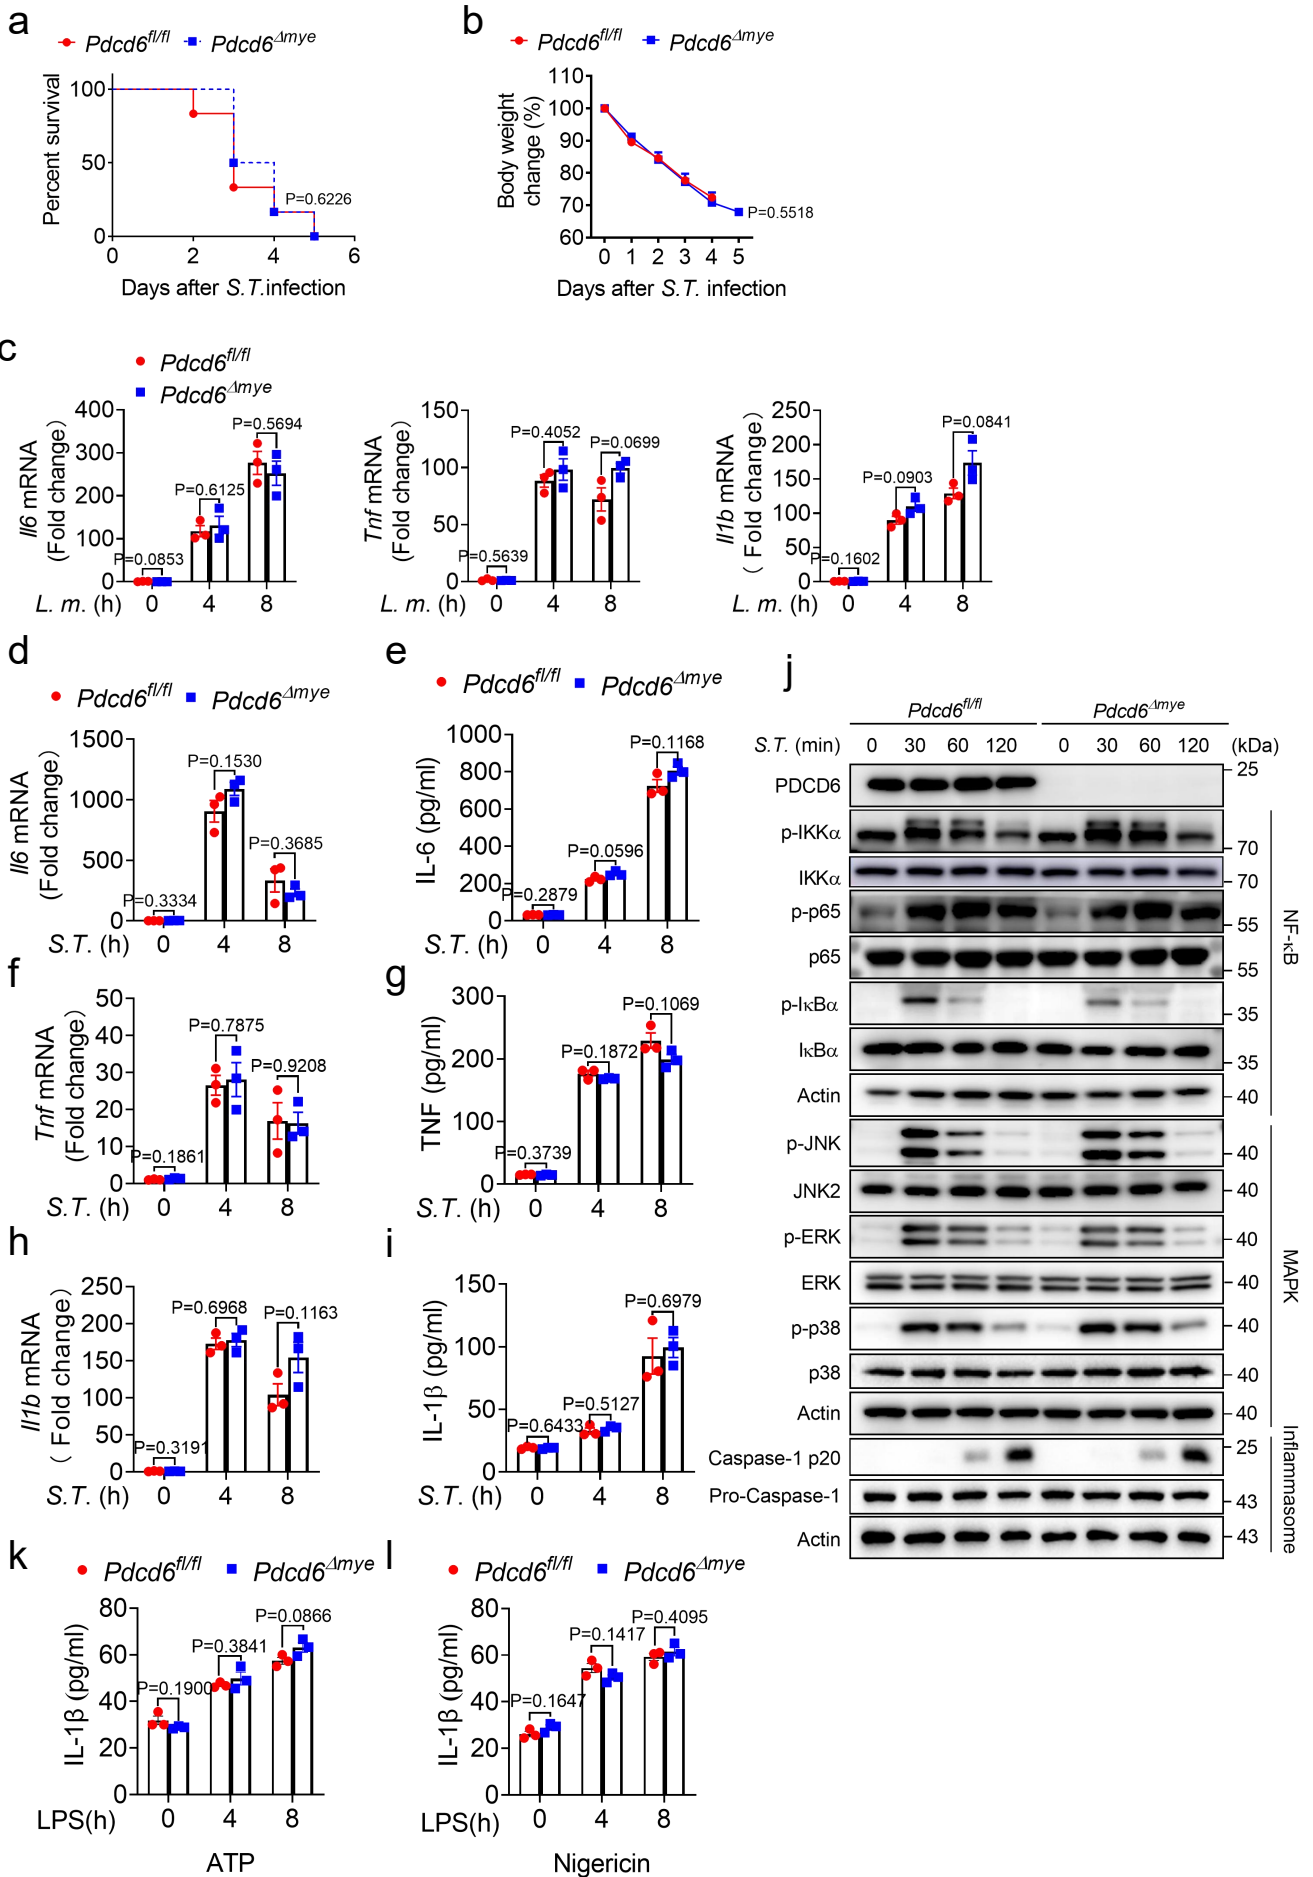

**Supplementary Fig. 2 *Pdcd6* deficiency attenuates bacterial growth without affecting cytokine production.**

**a, b** Survival (**a**) and body weight change (**b**) of *Pdcd6<sup>fl/fl</sup>* and *Pdcd6<sup>Amye</sup>* mice ( $n = 6$ , 3 male and 3 female for each group) after intraperitoneal injection with *S. Typhimurium* ( $0.5 \times 10^6$  c.f.u). **c-i** Gene transcripts in the cells (**c, d, f, h**) and cytokines in the supernatants (**e, g, i**) from *Pdcd6<sup>fl/fl</sup>* and *Pdcd6<sup>Amye</sup>* BMDMs left untreated or stimulated with *L. monocytogenes* (MOI, 5) (**c**) or *S. Typhimurium* (MOI, 5) (**d-i**) for indicated periods. **j** NF- $\kappa$ B, MAPK, and inflammasome activation signaling molecules in *Pdcd6<sup>fl/fl</sup>* and *Pdcd6<sup>Amye</sup>* BMDMs left untreated or stimulated with *S. Typhimurium* (MOI, 5) for indicated periods. **k-l** IL-1 $\beta$  in the supernatants from *Pdcd6<sup>fl/fl</sup>* and *Pdcd6<sup>Amye</sup>* BMDMs left untreated or stimulated with LPS (100 ng/ml) and further stimulated with ATP (5 mM) (**k**) or nigericin (10  $\mu$ M) (**l**) for indicated periods. The averages of  $n = 3$  (**c-i, k, l**) biologically independent samples are shown. Data are shown as the mean  $\pm$  SEM. Statistical significance was determined using *t*-test (and nonparametric tests) (**a-i, k, l**). The presented data are representative of three independent experiments (**a-l**).

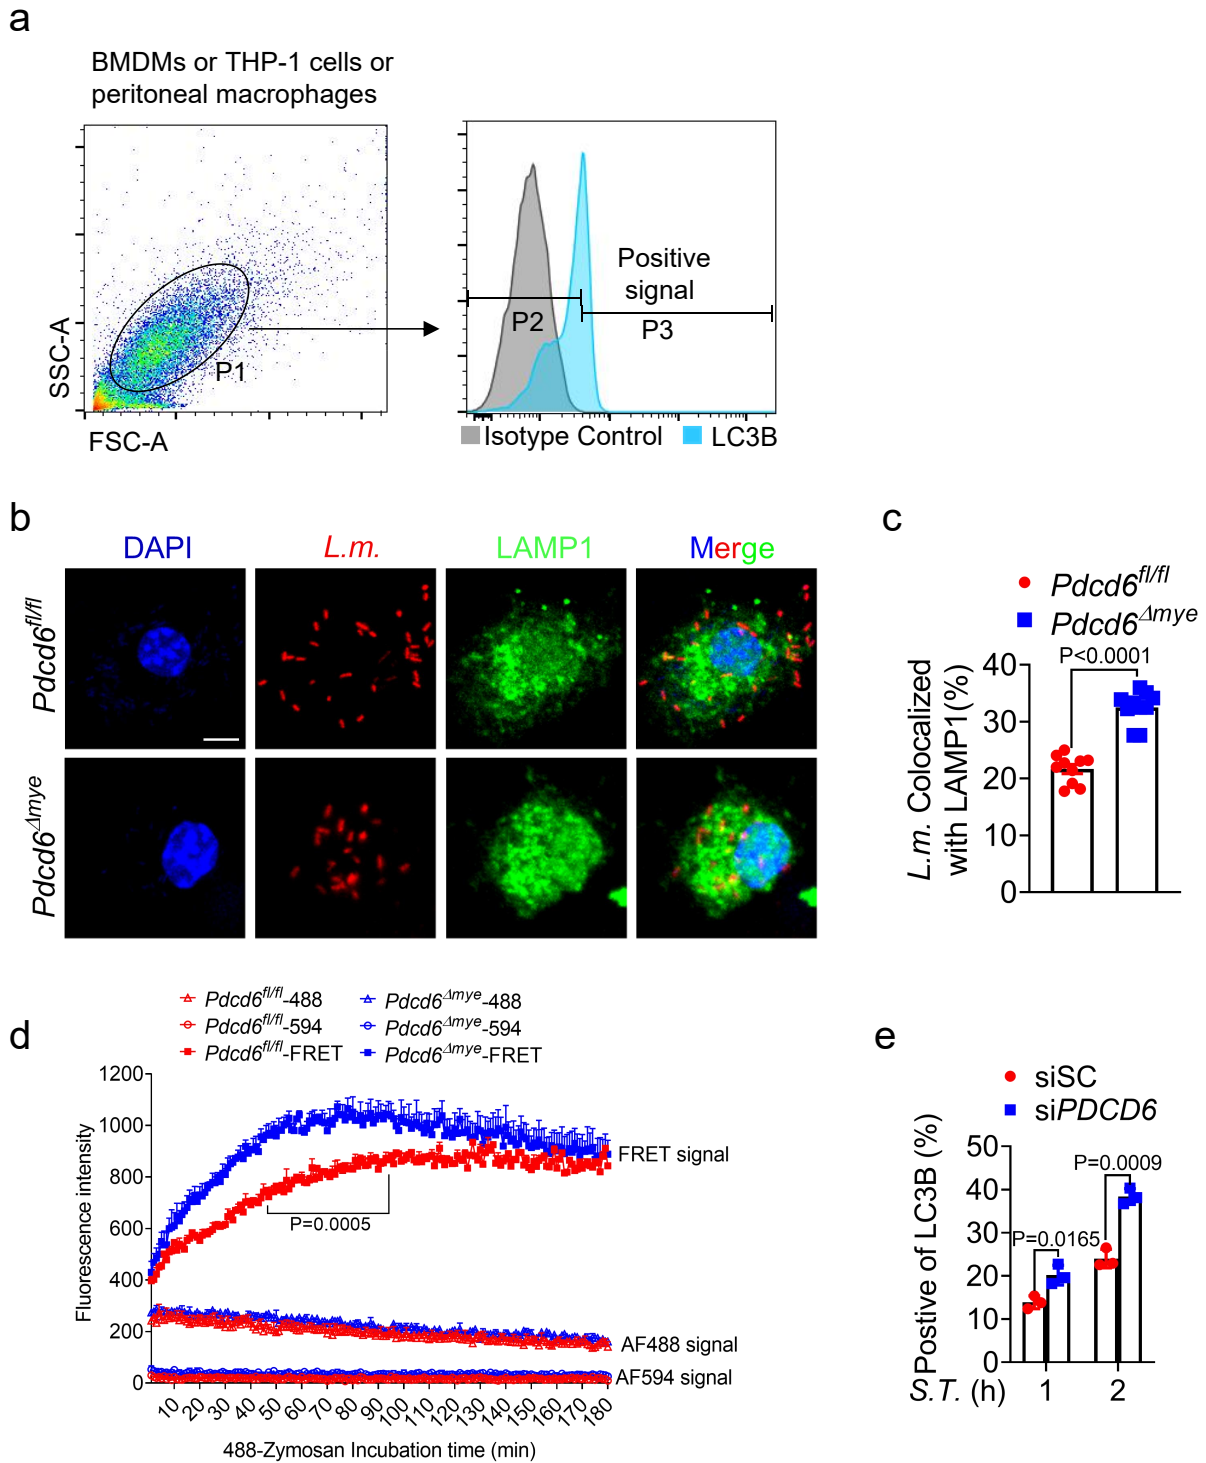

### Supplementary Fig. 3 PDCCD6 modulates phagosome-lysosome fusion.

**a** Gating strategy to detect LC3B level in BMDMs. Live cells were gated based on forward scatter area (FSC-A) and side scatter area (SSC-A), establishing the P1 gate. A subset of P1 gates was identified using FITC-A, with subset P2 serving as the blank control gate and subset P3 representing the positive signal gate. **b, c** Confocal images (**b**) and quantification (**c**) of the colocalization between *L. monocytogenes* (red) and LAMP1 (green) in *Pdcd6<sup>fl/fl</sup>* and *Pdcd6<sup>Δmye</sup>* BMDMs. Scale bar, 2  $\mu$ m. **d** FRET analysis of the fusion of phagosomes and lysosomes in *Pdcd6<sup>fl/fl</sup>* and *Pdcd6<sup>Δmye</sup>* BMDMs. **e** Flow cytometry analysis of LC3 fluorescence signal in siCtrl and siPDCCD6 THP-1 cells infected with *S. Typhimurium* (MOI, 5) for indicated periods. The averages of  $n = 10$  (**c**),  $n = 3$  (**d, e**) biologically independent samples are shown. Data are shown as the mean  $\pm$  SEM. Statistical significance was determined using *t*-test (and nonparametric tests) (**c, d, e**). The presented data are representative of three independent experiments (**b, d, e**).

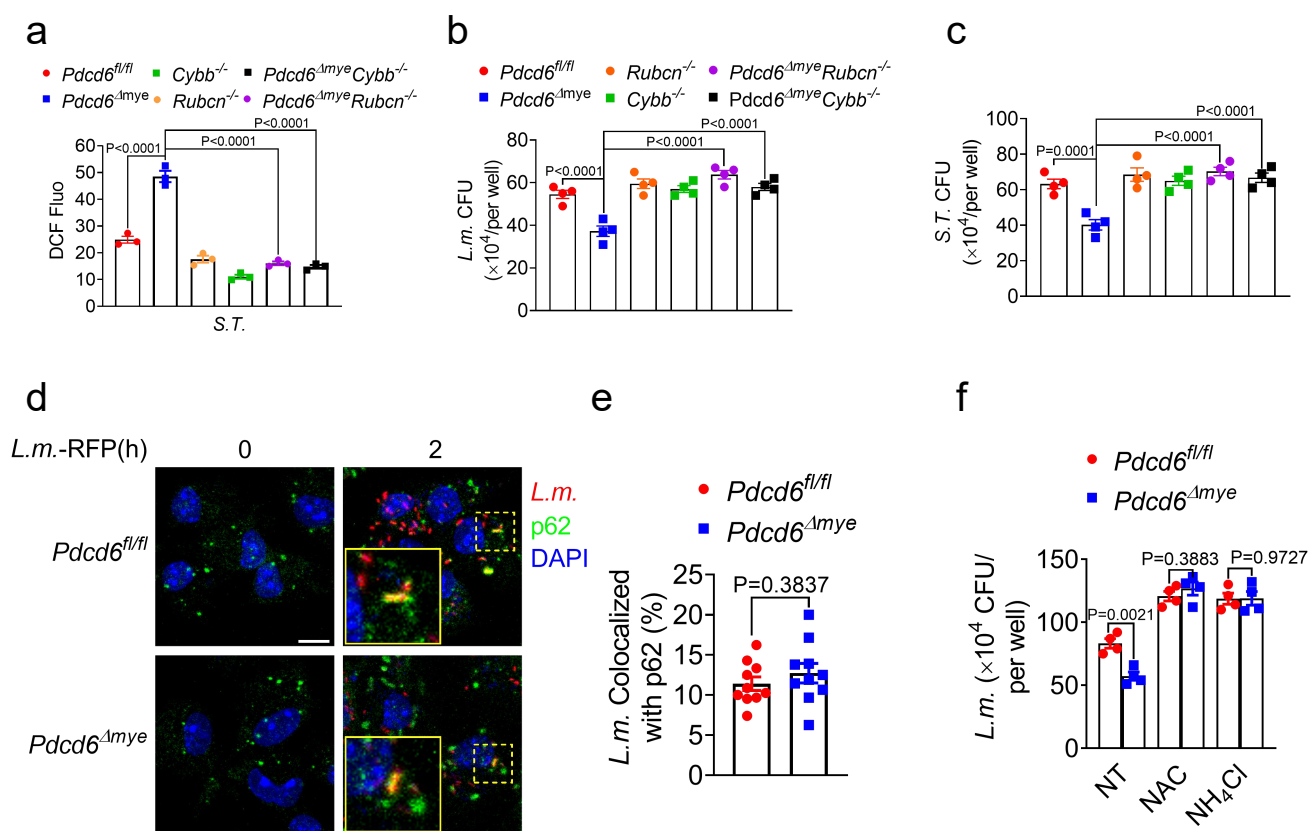

**Supplementary Fig. 4 LAP is required for PDCD6 deficiency-enhanced antibacterial immunity.**

**a** ROS production in *Pdcd6<sup>fl/fl</sup>*, *Pdcd6<sup>Δmye</sup>*, *Rubcn<sup>-/-</sup>*, *Pdcd6<sup>Δmye</sup>Rubcn<sup>-/-</sup>*, *Cybb<sup>-/-</sup>* and *Pdcd6<sup>Δmye</sup>Cybb<sup>-/-</sup>* BMDMs infected with *S. Typhimurium*. **b, c** Gentamicin protection assays on indicated BMDMs infected with *L. monocytogenes* (MOI, 5) (**b**) and *S. Typhimurium* (MOI, 5) (**c**) respectively. **d, e** Confocal images (**d**) and quantification (**e**) of the colocalization between *L. monocytogenes* (red) and p62 (green) in *Pdcd6<sup>fl/fl</sup>* and *Pdcd6<sup>Δmye</sup>* BMDMs. Scale bar, 5  $\mu$ m. **f** Gentamicin protection assays on given BMDMs infected with *L. monocytogenes* (MOI, 5) pretreated with NAC (5 mM) or NH<sub>4</sub>Cl (10  $\mu$ M) for 4 h. The averages of  $n = 3$  (**a**),  $n = 4$  (**b, c, f**),  $n = 10$  (**e**) biologically independent samples are shown. Data are shown as the mean  $\pm$  SEM. Statistical significance was determined using One-way ANOVA (multiple comparisons) (**a-c**) and *t*-test (and nonparametric tests) (**e, f**). The presented data are representative of three independent experiments (**a-d, f**).

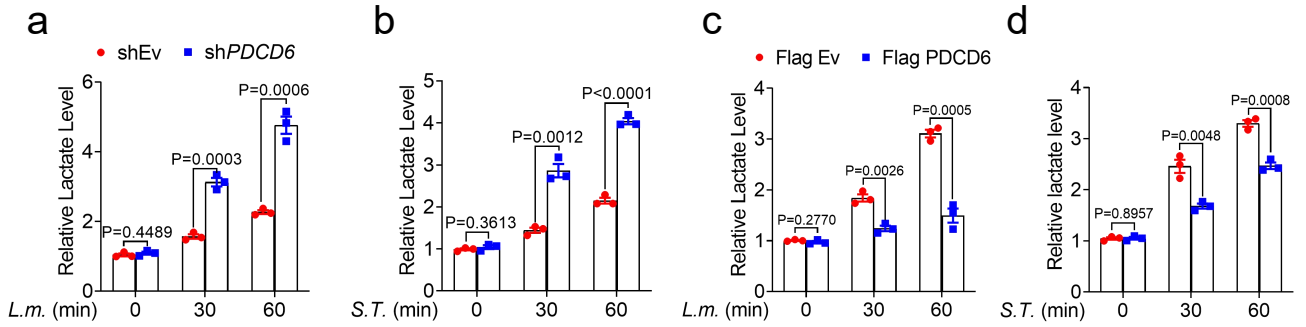

**Supplementary Fig. 5 Lactate level increases in PDCD6 deficient cells.**

**a, b** Lactate levels in shCtrl and shPDCD6 THP-1 cells treated with *L. monocytogenes* (MOI, 5) (**a**) or *S. Typhimurium* (MOI, 5) (**b**) for indicated periods. **c, d** Lactate levels in PDCD6-overexpressed THP-1 cells treated with *L. monocytogenes* (MOI, 5) (**c**) or *S. Typhimurium* (MOI, 5) (**d**) for indicated periods. The averages of  $n = 3$  (**a-d**) biologically independent samples are shown. Data are shown as the mean  $\pm$  SEM. Statistical significance was determined using *t*-test (and nonparametric tests) (**a-d**). The presented data are representative of three independent experiments (**a-d**).



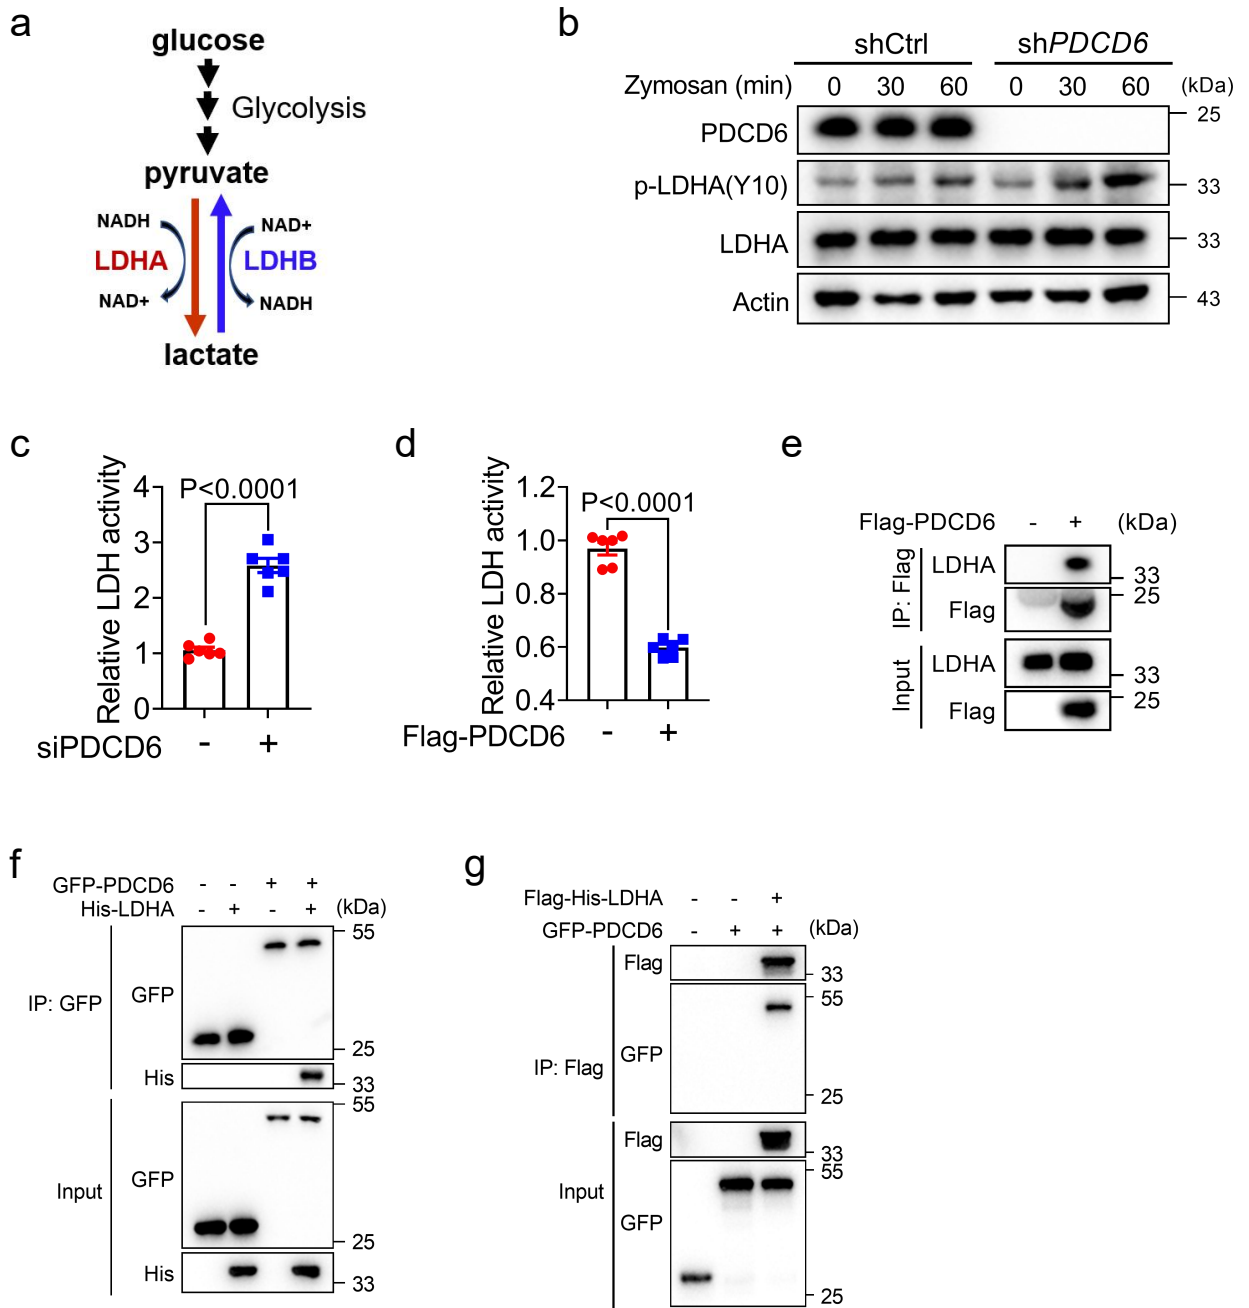

**Supplementary Fig. 6 PDCD6 binds to LDHA and modulates its activity.**

**a** Depiction of the metabolic pathway of lactate. **b** Immunoblotting of the expression of given proteins in *Pdcd6<sup>fl/fl</sup>* and *Pdcd6<sup>Δmye</sup>* BMDMs treated with Zymosan for indicated periods. **c, d** LDH activity in PDCD6-knockdown (**c**) and PDCD6-overexpressed (**d**) THP-1 cells. **e, f, g** 293T cells were transfected for 30 h with the indicated plasmids. Immunoprecipitated proteins were assessed with given antibodies. The averages of  $n = 6$  (**c, d**) biologically independent samples are shown. Data are shown as the mean  $\pm$  SEM. Statistical significance was determined using *t*-test (and nonparametric tests) (**c, d**). The presented data are representative of three independent experiments (**b-g**).

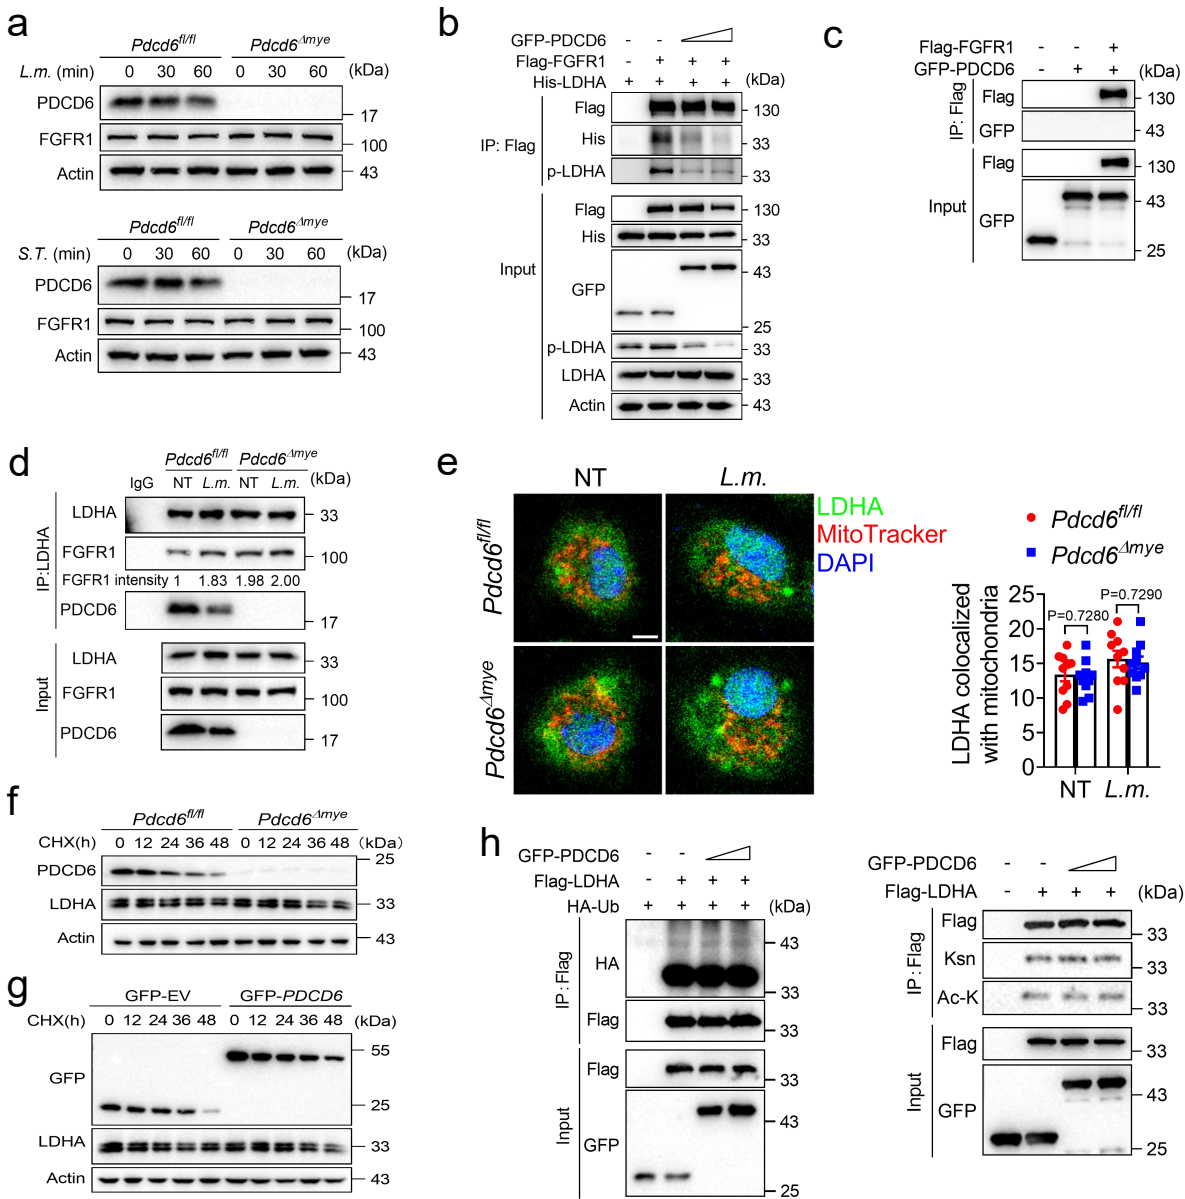

**Supplementary Fig. 7 PDCD6 inhibits FGFR1-mediated LDHA activation without affecting its localization or stability.**

**a** The expressions of FGFR1 in *Pdcd6<sup>fl/fl</sup>* and *Pdcd6<sup>Δmye</sup>* BMDMs left untreated or stimulated with *L. monocytogenes* (MOI, 5) or *S. Typhimurium* (MOI, 5) for indicated periods. **b, c** 293T cells were transfected with the specified plasmids for 30 hours. The immunoprecipitated proteins were then analyzed using the corresponding antibodies. **d** Total LDHA was immunoprecipitated from *Pdcd6<sup>fl/fl</sup>* and *Pdcd6<sup>Δmye</sup>* BMDMs challenged with or without *L. monocytogenes* (MOI, 5) for 1 hr, followed by immunoblotting with anti-FGFR1 and anti-PDCD6 antibody. **e** Confocal images (**left**) and quantification (**right**) of the colocalization between LDHA (green), mitochondrial (red) and nuclei (blue) in *Pdcd6<sup>fl/fl</sup>* and *Pdcd6<sup>Δmye</sup>* BMDMs with *L. monocytogenes* challenge or left untreated. Scale bar, 1 μm. **f, g** LDHA stability determined by western blot in *Pdcd6<sup>fl/fl</sup>* and *Pdcd6<sup>Δmye</sup>* BMDMs (**f**) or PDCD6-overexpressed THP-1 cells (**g**) versus indicated controls. Cells were treated with cycloheximide (CHX) (100 μg/ml) for the given times. **h** 293T cells were transfected with the specified plasmids for 30 hours, followed by immunoprecipitation and antibody-based protein analysis. The averages of  $n = 10$  (**e**) biologically independent samples are shown. Data are shown as the mean ± SEM. Statistical significance was determined using *t*-test (and nonparametric tests) (**e**). The presented data are representative of three independent experiments (**a-h**).

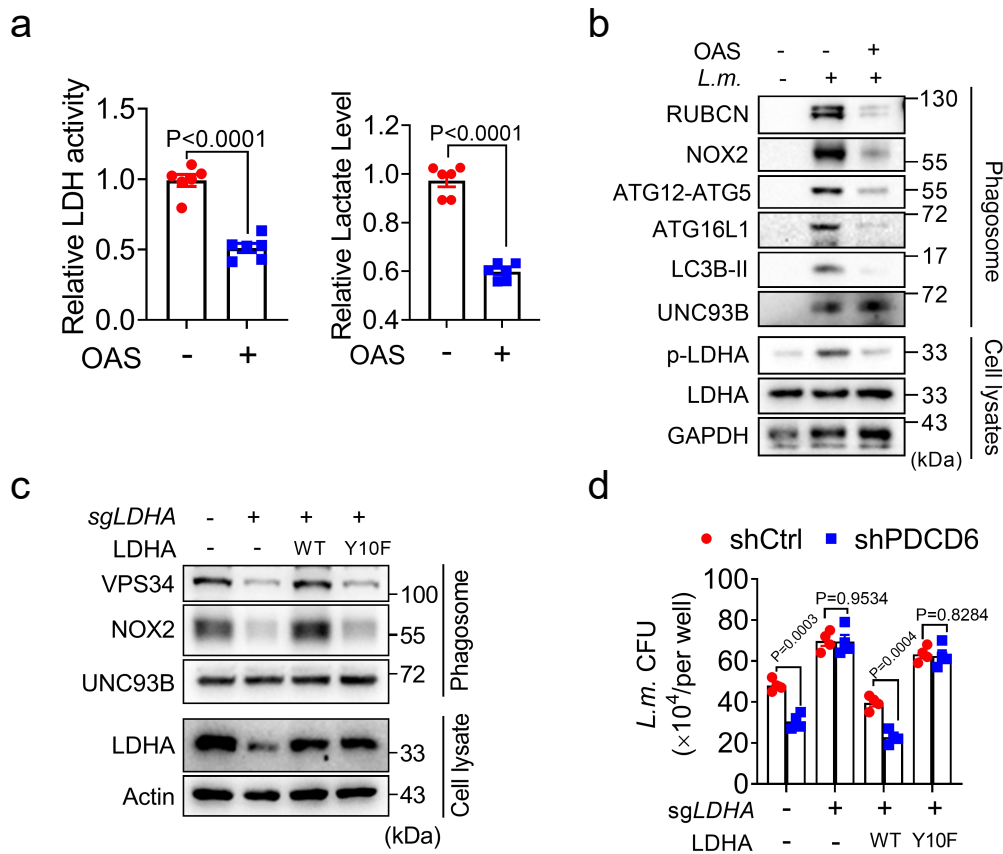

**Supplementary Fig. 8 LDHA activity is essential for LAP formation and enhanced bactericidal effect in PDCD6-deficient cells.**

**a** LDH activity and lactate level in BMDMs treated with or without OAS. **b, c** Immunoblotting of LAP-associated molecules in phagosomes and whole cell lysate isolated from BMDMs pretreated with or without OAS (**b**), or from LDHA-KO THP-1 cells reconstituted with LDHA wild-type or LDHA Y10F (**c**), followed by *L. monocytogenes* challenge. **d** Gentamicin protection assays on given THP-1 cells infected with *L. monocytogenes*. The averages of  $n = 6$  (**a**),  $n = 4$  (**d**) biologically independent samples are shown. Data are shown as the mean  $\pm$  SEM. Statistical significance was determined using *t*-test (and nonparametric tests) (**a, d**). The presented data are representative of three independent experiments (**a-d**).

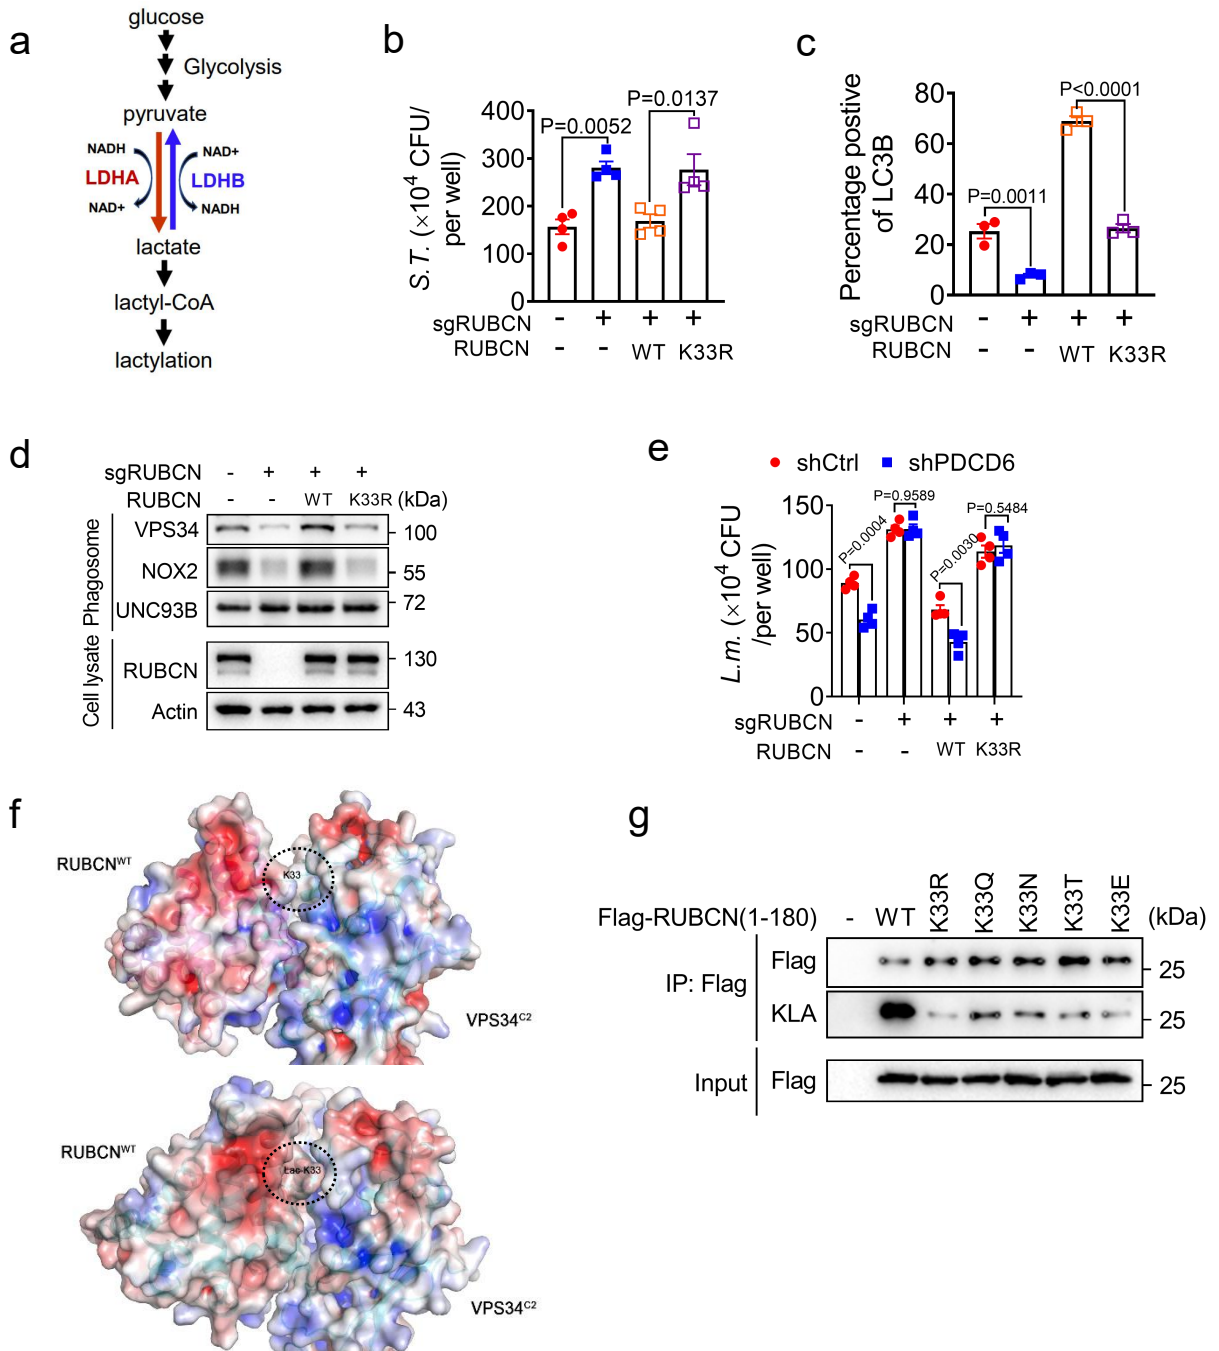

**Supplementary Fig. 9 Lactylation of RUBCN enhances bactericidal activity and its interaction with VPS34.**

**a** Schematic diagram of lactate metabolism. **b, c** Gentamicin protection assays (**b**) and flow cytometry analysis of LC3 fluorescence signal (**c**) on RUBCN KO THP-1 cells with reconstitution of RUBCN WT or K33R mutant followed by *S. Typhimurium* challenge. **d** Immunoblotting of LAP-associated molecules in phagosomes and whole cell lysate isolated from RUBCN KO THP-1 cells with reconstitution of RUBCN WT or K33R mutant followed by *L. monocytogenes* challenge. **e** Gentamicin protection assays on given THP-1 cells infected with *L. monocytogenes*. **f** The surface charge distribution of RUBCN WT system with lactylation (up), RUBCN K33R system (down). The black dash cycles indicate the lactylation site of RUBCN. These complex conformations are all the first frame of MD simulation for each system. **g** 293T cells transfected with the indicated plasmids for 30 h, followed immunoprecipitation assay to detect lactylation. The averages of  $n = 4$  (**b, e**),  $n = 3$  (**c**), biologically independent samples are shown. Data are shown as the mean  $\pm$  SEM. Statistical significance was determined using One-way ANOVA (multiple comparisons) (**b, c**) and *t*-test (and nonparametric tests) (**e**). The presented data are representative of three independent experiments (**b-c, g**).

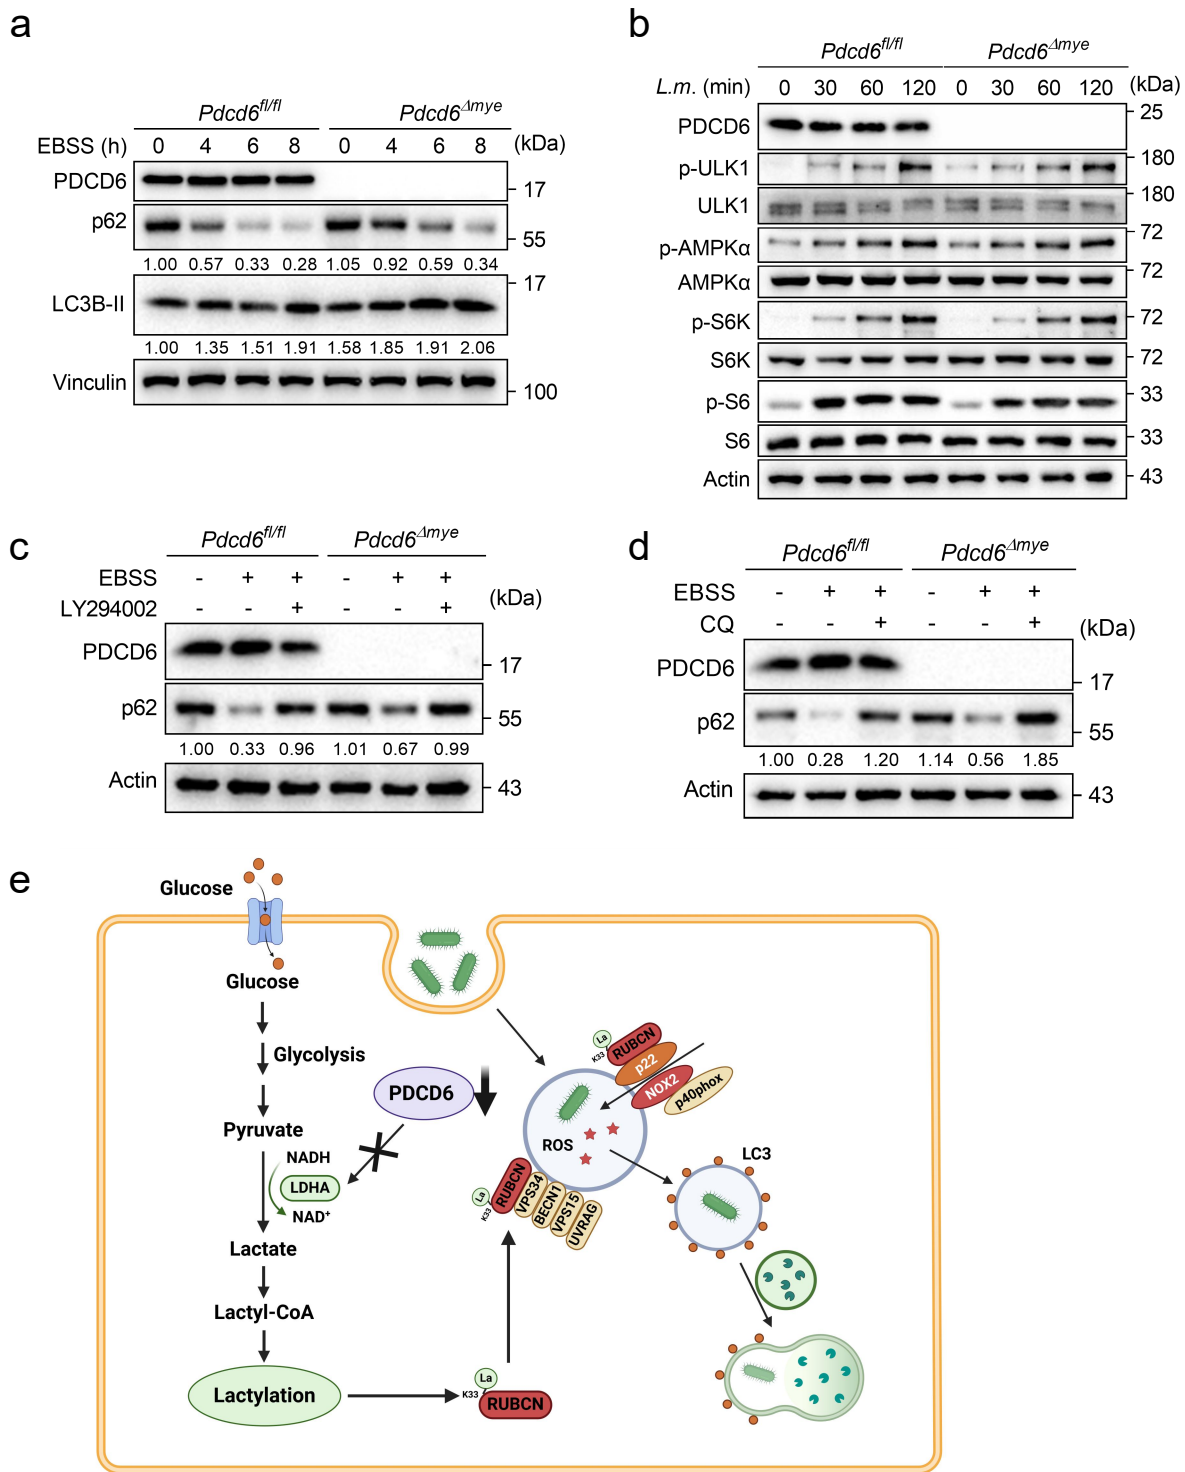

**Supplementary Fig. 10 PDCD6 deficiency results in impaired autophagosome maturation.**

**a** Immunoblotting of LC3B and p62 in *Pdcd6<sup>fl/fl</sup>* and *Pdcd6<sup>Δmye</sup>* BMDMs with EBSS incubation for given times. **b** Immunoblotting of AMPK and mTOR signaling molecules in *Pdcd6<sup>fl/fl</sup>* and *Pdcd6<sup>Δmye</sup>* BMDMs challenged with *L. monocytogenes* (MOI, 5) for indicated periods. **c**, **d** Immunoblotting of p62 in *Pdcd6<sup>fl/fl</sup>* and *Pdcd6<sup>Δmye</sup>* BMDMs with LY294002 (10 μM) (**c**), or Chloroquine (CQ) (5 μM) (**d**) pretreatment for 4 hours, followed EBSS incubation for another 4 hours. **e** Schematic representation of the mechanism of PDCD6 regulating LC3-associated phagocytosis and antibacterial immunity. The illustration was created in BioRender. Lulu, S. (2024) <https://BioRender.com/r60a657>. The presented data are representative of three independent experiments (**a-d**).

**Supplementary Table 1.** Differential expressions of Programmed Cell Death (PDCD) family genes left or stimulated with *L. monocytogenes*.

| Gene name | NT       |          |          | <i>L. monocytogenes</i> |          |          | P value |
|-----------|----------|----------|----------|-------------------------|----------|----------|---------|
|           | #1_FPKM  | #2_FPKM  | #3_FPKM  | #1_FPKM                 | #2_FPKM  | #3_FPKM  |         |
| Pdcd2     | 2.602704 | 3.478187 | 3.874865 | 1.707464                | 1.283281 | 1.772765 | 0.013   |
| Pdcd4     | 1.001026 | 0.662019 | 0.901377 | 1.68305                 | 1.089004 | 1.025403 | 0.1516  |
| Pdcd5     | 2.651803 | 2.652909 | 3.092683 | 1.909768                | 1.973184 | 2.143499 | 0.0083  |
| Pdcd6     | 47.20366 | 42.99672 | 45.92423 | 37.16613                | 35.68543 | 36.84454 | 0.0026  |
| Pdcd7     | 5.982611 | 5.515059 | 5.07077  | 4.551977                | 4.777349 | 3.320416 | 0.0672  |
| Pdcd10    | 14.90303 | 14.45043 | 13.56423 | 17.86296                | 17.0125  | 17.47042 | 0.0025  |
| Pdcd11    | 9.224934 | 9.950908 | 10.54168 | 6.080339                | 6.09157  | 6.331243 | 0.0007  |

**Supplementary Table 2.** Differential metabolites between Non-treated and zymosan-treated groups.

| Metabolites         | NT                           |       |       |       |                             |       |       |       | Zymosan                      |       |       |       |                             |       |       |       |       |
|---------------------|------------------------------|-------|-------|-------|-----------------------------|-------|-------|-------|------------------------------|-------|-------|-------|-----------------------------|-------|-------|-------|-------|
|                     | <i>Pdcd6<sup>fl/fl</sup></i> |       |       |       | <i>Pdcd6<sup>Δmye</sup></i> |       |       |       | <i>Pdcd6<sup>fl/fl</sup></i> |       |       |       | <i>Pdcd6<sup>Δmye</sup></i> |       |       |       |       |
| D-Glucose           | 1E+05                        | 1E+05 | 2E+05 | 1E+05 | 2E+05                       | 2E+05 | 2E+05 | 2E+05 | 2E+05                        | 1E+05 | 2E+05 | 2E+05 | 2E+05                       | 2E+05 | 3E+05 | 2E+05 | 2E+05 |
| Glyceraldehyde      | 28720                        | 32631 | 30222 | 29849 | 33957                       | 36190 | 33785 | 35416 | 31583                        | 34054 | 33735 | 34134 | 41391                       | 43103 | 46361 | 43456 |       |
| Pyruvic acid        | 59880                        | 66136 | 68745 | 64247 | 78184                       | 76559 | 71201 | 72094 | 72631                        | 77768 | 74261 | 71446 | 83246                       | 86974 | 92131 | 81420 |       |
| Lactate             | 1E+05                        | 2E+05 | 2E+05 | 2E+05 | 3E+05                       | 3E+05 | 3E+05 | 3E+05 | 3E+05                        | 4E+05 | 3E+05 | 4E+05 | 5E+05                       | 6E+05 | 5E+05 | 6E+05 |       |
| Mannose 6-phosphate | 6E+05                        | 7E+05 | 6E+05 | 7E+05 | 1E+06                       | 2E+06 | 2E+06 | 1E+06 | 5E+05                        | 4E+05 | 5E+05 | 4E+05 | 8E+05                       | 9E+05 | 9E+05 | 8E+05 |       |
| Citric acid         | 20009                        | 20586 | 20148 | 21164 | 90065                       | 77483 | 79183 | 84552 | 22999                        | 22498 | 24803 | 26515 | 82487                       | 81192 | 79840 | 82131 |       |
| α-Ketoglutaric acid | 10424                        | 11251 | 11395 | 12130 | 20141                       | 20701 | 21300 | 20835 | 10482                        | 12406 | 12788 | 13315 | 14662                       | 14570 | 17011 | 16327 |       |
| Succinic acid       | 98182                        | 1E+05 | 95298 | 90764 | 80702                       | 75327 | 76508 | 77281 | 2E+05                        | 2E+05 | 2E+05 | 2E+05 | 1E+05                       | 1E+05 | 1E+05 | 1E+05 |       |
| Malic acid          | 49277                        | 53038 | 54512 | 52573 | 75295                       | 69394 | 70792 | 69531 | 52289                        | 57066 | 57038 | 57905 | 77816                       | 69312 | 74543 | 75619 |       |
| Oxalic acid         | 23379                        | 24498 | 22507 | 21824 | 31483                       | 28557 | 32600 | 28797 | 26053                        | 26571 | 23576 | 22064 | 28418                       | 26294 | 26046 | 24915 |       |
| Oxaloacetic acid    | 12389                        | 12228 | 12706 | 11935 | 14731                       | 15441 | 13934 | 14213 | 12151                        | 13815 | 13745 | 13216 | 16283                       | 17625 | 19066 | 16924 |       |
| Glutamine           | 3E+06                        | 3E+06 | 3E+06 | 3E+06 | 5E+06                       | 5E+06 | 5E+06 | 5E+06 | 3E+06                        | 4E+06 | 3E+06 | 3E+06 | 4E+06                       | 4E+06 | 4E+06 | 4E+06 |       |
| Glucosamine         | 79405                        | 58119 | 70036 | 61206 | 70606                       | 77341 | 54566 | 91676 | 98103                        | 79404 | 95061 | 86832 | 78594                       | 90681 | 74687 | 81235 |       |
| UDP-glucose         | 699.1                        | 1420  | 890.5 | 1288  | 1764                        | 1549  | 1549  | 1456  | 1282                         | 1425  | 1353  | 1284  | 2087                        | 1146  | 1960  | 1234  |       |

**Supplementary Table 3.** The binding free energy of RUBCN<sup>WT</sup> and RUBCNK<sup>33R</sup>

| Energy Component         | Energy (kcal/mol)   |                       |
|--------------------------|---------------------|-----------------------|
|                          | RUBCN <sup>WT</sup> | RUBCN <sup>K33R</sup> |
| E <sub>VDW</sub>         | -191.7720±11.2556   | -153.5329±5.7677      |
| E <sub>Ele</sub>         | -792.2018±71.535    | -576.0949±26.9629     |
| E <sub>GB</sub>          | 882.3851±67.9718    | 677.5548±25.5377      |
| E <sub>Surf</sub>        | -28.8035±0.9858     | -23.4777±0.7502       |
| $\Delta G_{\text{gas}}$  | -983.9379±69.0169   | -729.6277±26.2965     |
| $\Delta G_{\text{solv}}$ | 853.5816±67.8443    | 654.0771±25.3899      |
| $\Delta G$               | -130.3923±9.5918    | -75.5507±10.6949      |



**Supplementary Table 4.** Primer sequences for qPCR.

| <b>Genes</b>        | <b>Forward</b>         | <b>Reverse</b>          |
|---------------------|------------------------|-------------------------|
| Mouse <i>Pdcd6</i>  | TCAGCAAGCATTATCCAATGGT | TCCTGTCTTTATCGACCCTCTG  |
| Mouse <i>Il6</i>    | AGCTGGAGTCACAGAAGGAG   | AGGCATAACGCACTAGGTTT    |
| Mouse <i>Tnfa</i>   | GTCAGGTTGCCTCTGTCTCA   | TCAGGGAAGAGTCTGGAAAG    |
| Mouse <i>Il1b</i>   | GCAACTGTTCTGAACTCAACT  | ATCTTTTGGGGTCCGTCAACT   |
| Mouse <i>Marco</i>  | ATGGCACCAAGGGAGACAAAGG | GCCTGGTTTTCCAGCATCACCT  |
| Mouse <i>Clec7a</i> | CCAGCTAGGTGCTCATCTACTG | CCTTCACTCTGATTGCGGGAAAG |
| Mouse <i>Actb</i>   | AGGGCTATGCTCTCCCTCAC   | CTCTCAGCTGTGGTGGTGAA    |

**Supplementary Table 5.** Primer sequences for site-directed mutagenesis.

---

|                   |         |                                           |
|-------------------|---------|-------------------------------------------|
| RUBCN(K33R)       | Forward | GCAGTTGCTGGGTAATTTGCGGACGACGGTGGAGGGTTTG  |
|                   | Reverse | CAAACCCTCCACCGTCGTCCGCAAATTACCCAGCAACTGC  |
| RUBCN(K50R)       | Forward | AGCCCCAACGTCTGGTCTAGGTATGGTGGCTTGGAGCGGC  |
|                   | Reverse | GCCGCTCCAAGCCACCATACCTAGACCAGACGTTGGGGCT  |
| RUBCN(K86R)       | Forward | TACTGGCAGTTCGTGAGAGACATCCGGTGGCTCAGTCCCC  |
|                   | Reverse | GGGACTGAGCCACCGGATGTCTCTCACGAACTGCCAGTA   |
| Flag-RUBCN(K101R) | Forward | AGCCCTTCACGTGGAGAGGTTTCATCAGCGTGCACGAGAAC |
|                   | Reverse | GTTCTCGTGCACGCTGATGAACCTCTCCACGTGAAGGGCT  |
| RUBCN(K151R)      | Forward | CGGGGATAGACAGTATATCAGAAGATTCTACACAGATGCT  |
|                   | Reverse | AGCATCTGTGTAGAATCTTCTGATATACTGTCTATCCCCG  |
| LDHA(Y10F)        | Forward | CTAAAGGATCAGCTGATTTTCAATCTTCTAAAGGAAGAAC  |
|                   | Reverse | GTTCTTCCTTTAGAAGATTGAAAATCAGCTGATCCTTTAG  |

---
