# Supplementary material for: PDCD6 regulates lactate metabolism to modulate LC3-associated phagocytosis and antibacterial defense
Source: PubMed Central journal article supplement — Nat Commun. 2024 Nov 23;15:10157. doi: 10.1038/s41467-024-54377-w (PMC11584876; doi:10.1038/s41467-024-54377-w), 2024-11-23
Supplement: 41467_2024_54377_MOESM2_ESM.pdf [file 41467_2024_54377_MOESM2_ESM.pdf]

## **Description of Additional Supplementary Files**

**Supplementary Data 1.** Candidate interactors of PDCD6 detected by mass spectrometry.

**Supplementary Data 2.** The information of antibodies.

**Supplementary Movie 1, 2** *Pdcd6<sup>fl/fl</sup>* BMDMs and *Pdcd6<sup>Δmye</sup>* BMDMs were infected with DCFH2-labeled *Listeria monocytogenes* (*L.m.*) and subjected to time-lapse imaging using an excitation wavelength of 450 nm and an emission wavelength of 520 nm to monitor the real-time dynamics of reactive oxygen species (ROS) production. Supplementary Movie 1 depicts ROS dynamics in *Pdcd6<sup>fl/fl</sup>* BMDMs, while Supplementary Movie 2 shows ROS dynamics in *Pdcd6<sup>Δmye</sup>* BMDMs.
